# Supplementary material for: Two RP-HPLC assay methods with different chromatographic approaches for the simultaneous estimation of bambuterol and its main degradation product, terbutaline
Source: Royal Society of Chemistry journal article supplement (doi:10.1039/c9ay00123a), 2019-01-01

### Optimization of chromatographic conditions

**\*\*For micellar method (method I):**

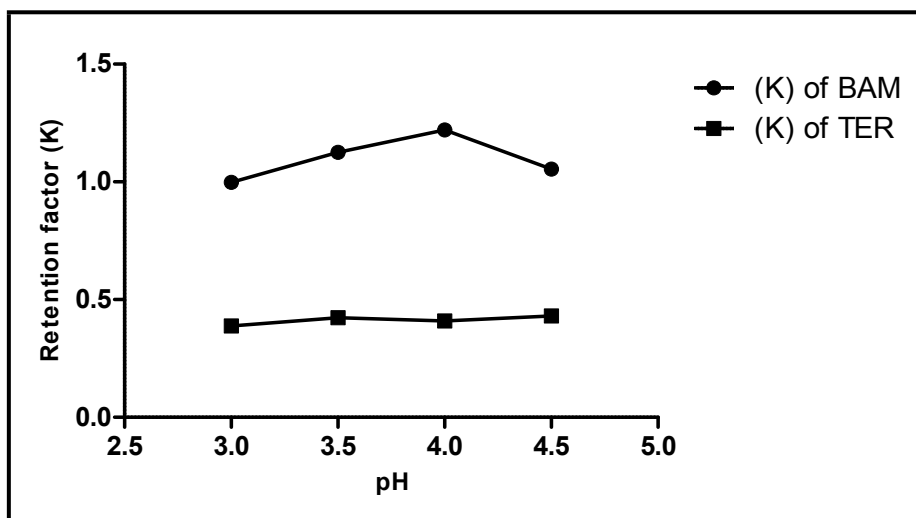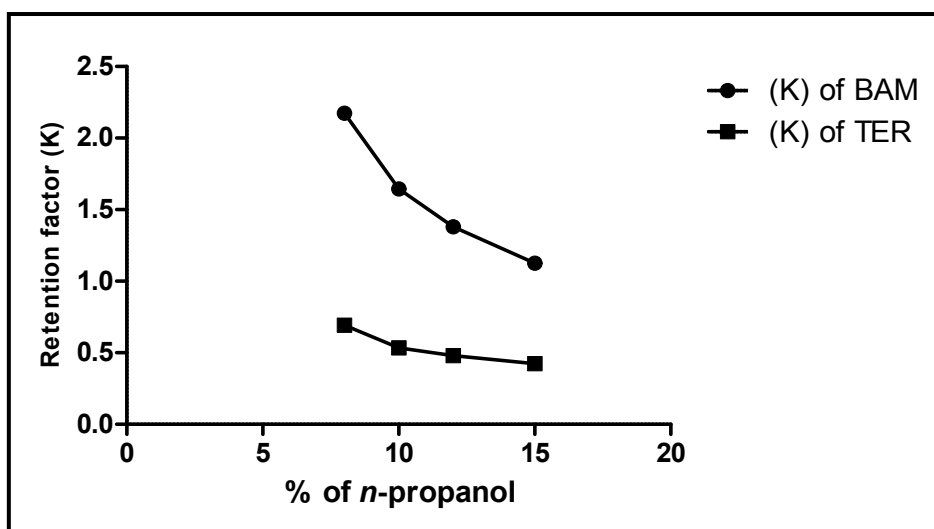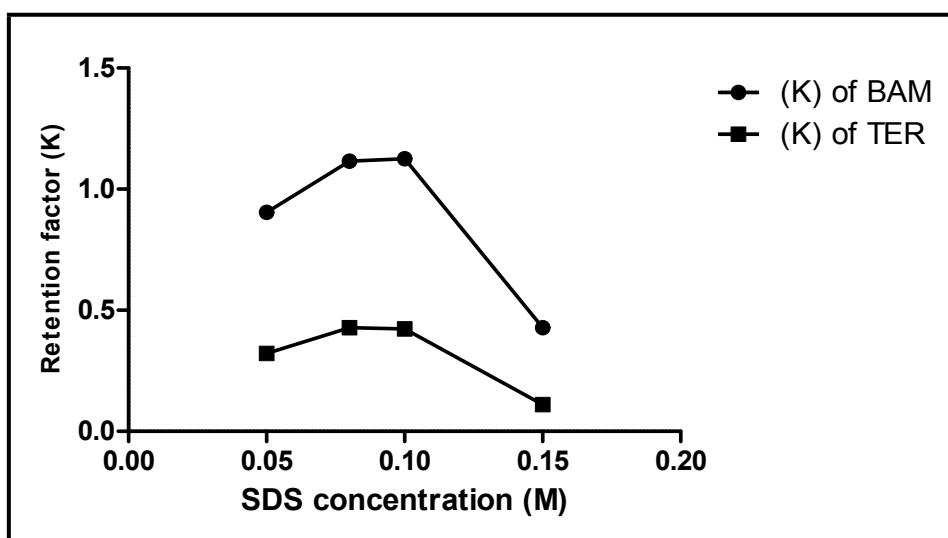

**\*\*For aqueous method (method II):**

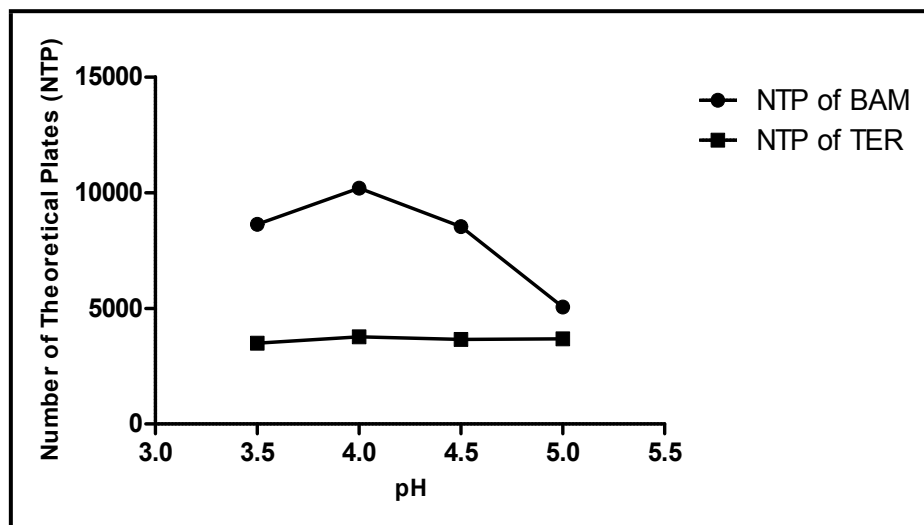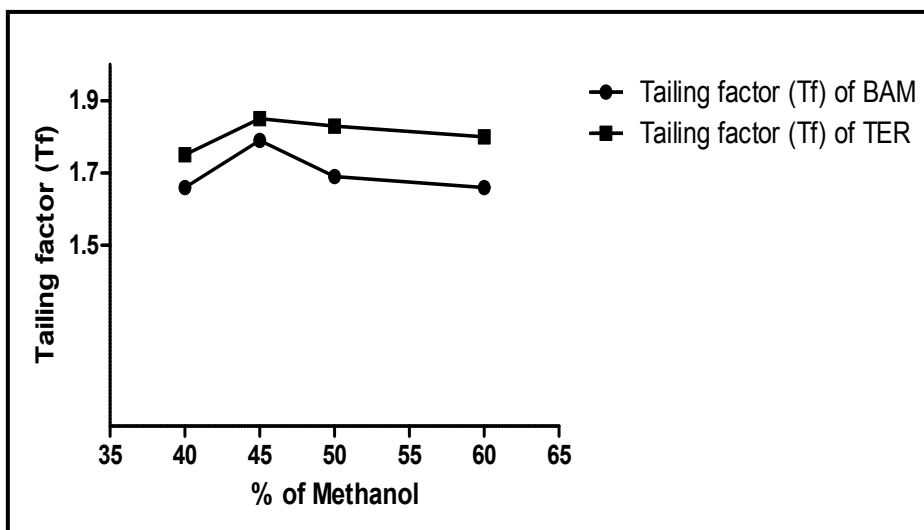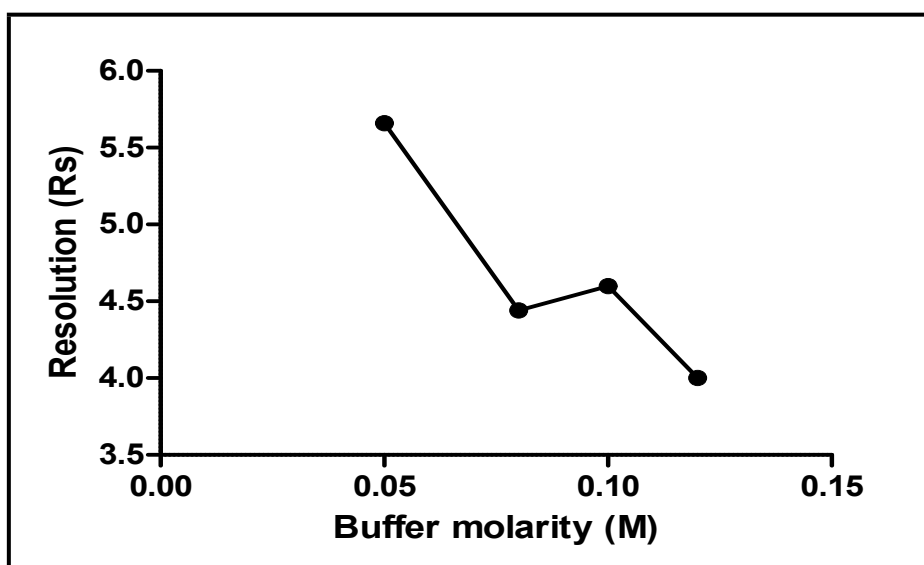

Supplement: c9ay00123a1.pdf [file c9ay00123a1.pdf]
